# Supplementary material for: Establishing normal metabolism and differentiation in hepatocellular carcinoma cells by culturing in adult human serum
Source: PubMed Central journal article supplement (PMC6076254; doi:10.1038/s41598-018-29763-2), 2018-08-03
Supplement: 41598_2018_29763_MOESM1_ESM.pdf [file 41598_2018_29763_MOESM1_ESM.pdf]

**Supplemental data**

**Establishing normal metabolism and differentiation in hepatocellular carcinoma cells by culturing in adult human serum.** Rineke Steenbergen,

Martin Oti, Rob ter Horst, Wilson Tat, Chris Neufeldt, Alexandr Belovodskiy, Tiing Tiing Chua, Woo Jung Cho, Michael Joyce, Bas E. Dutilh, D. Lorne Tyrrell

## Supplemental Data 1

### Other morphological changes in HS cultured cells

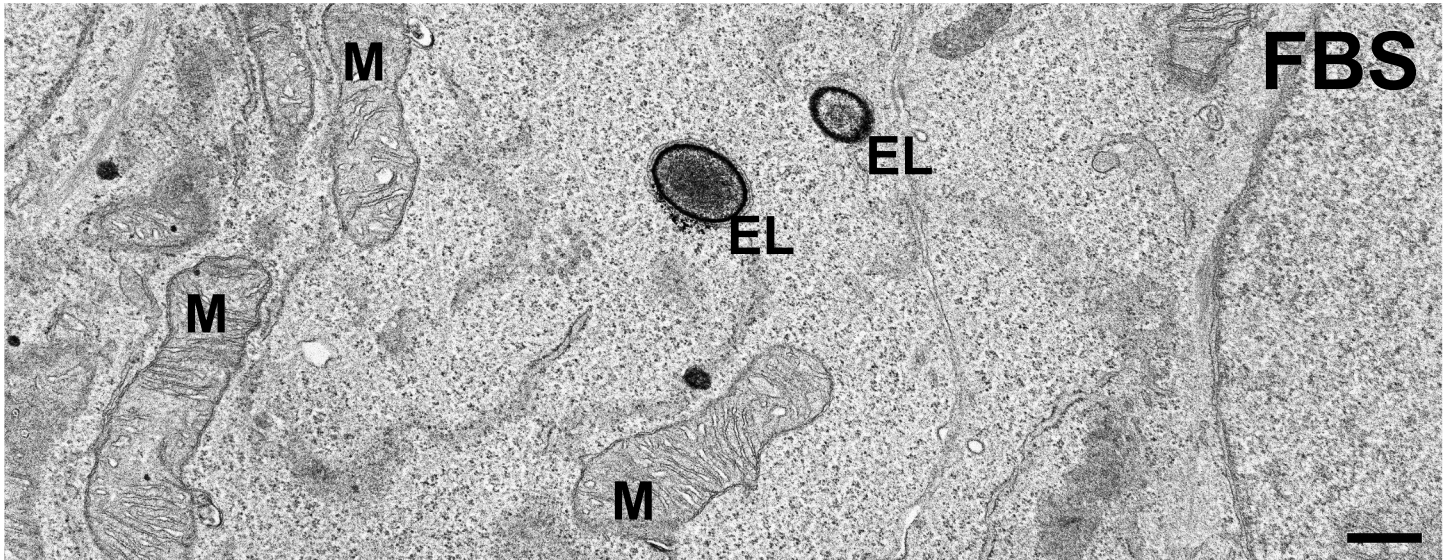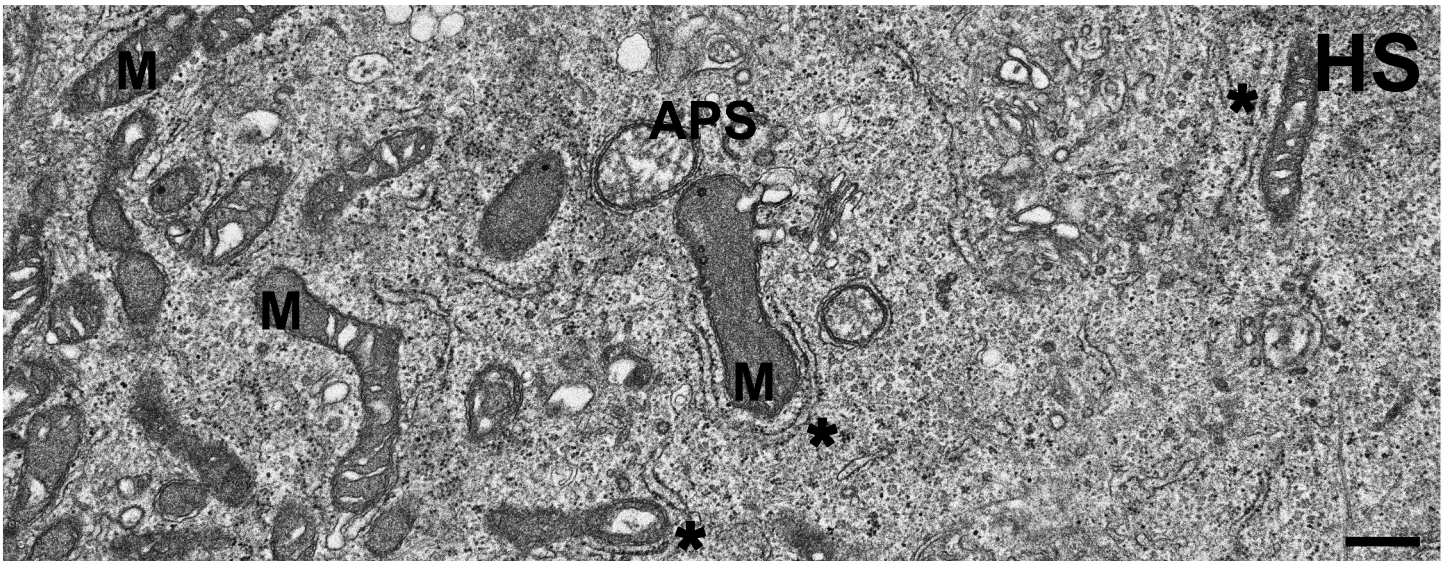

Additional morphological changes that were observed in the electron microscopic analysis include:

- The cytoplasm of HS cultured cells appears much more 'crowded' than the cytoplasm of FBS cultured cells.
- Mitochondrial (M) morphology has drastically changed, as outlined in figure 4 of the main document.
- In general, organelles appeared more structured and organized, for example, the endoplasmic reticulum (asterisks) shows a higher degree of organization, particularly around the mitochondria.
- An increase in vesicle transport and changes in autophagy and the lysosomal pathways were also observed on the electron micrographs. Whereas in FBS cells early lysosomes (EL) are abundant, other components of the endosomal/lysosomal pathway were harder to find, and no evidence was found of autophagy. In HS cultured cells late endosomes, multivesicular bodies and autophagosomes (APS) were abundant, potentially indicating a better functioning or more balanced endosomal/lysosomal/autophagosomal pathway is operational in HS cultured cells.

Supplemental Data 2

| <b>Comparison</b> | <b>Number of differentially expressed probes<br/>(multiple testing corrected, <math>p &lt; 0.05</math>)</b> | <b>%</b> |
|-------------------|-------------------------------------------------------------------------------------------------------------|----------|
| FBS - HSd8        | 16304                                                                                                       | 33       |
| FBS - HSd15       | 11420                                                                                                       | 23       |
| FBS - HSd23       | 16252                                                                                                       | 33       |

Number of differentially expressed probes for the different pairwise comparisons between days. The total number of probes on the Primeview Array was 49395.

## Supplemental data 3, hierarchical clustering analysis

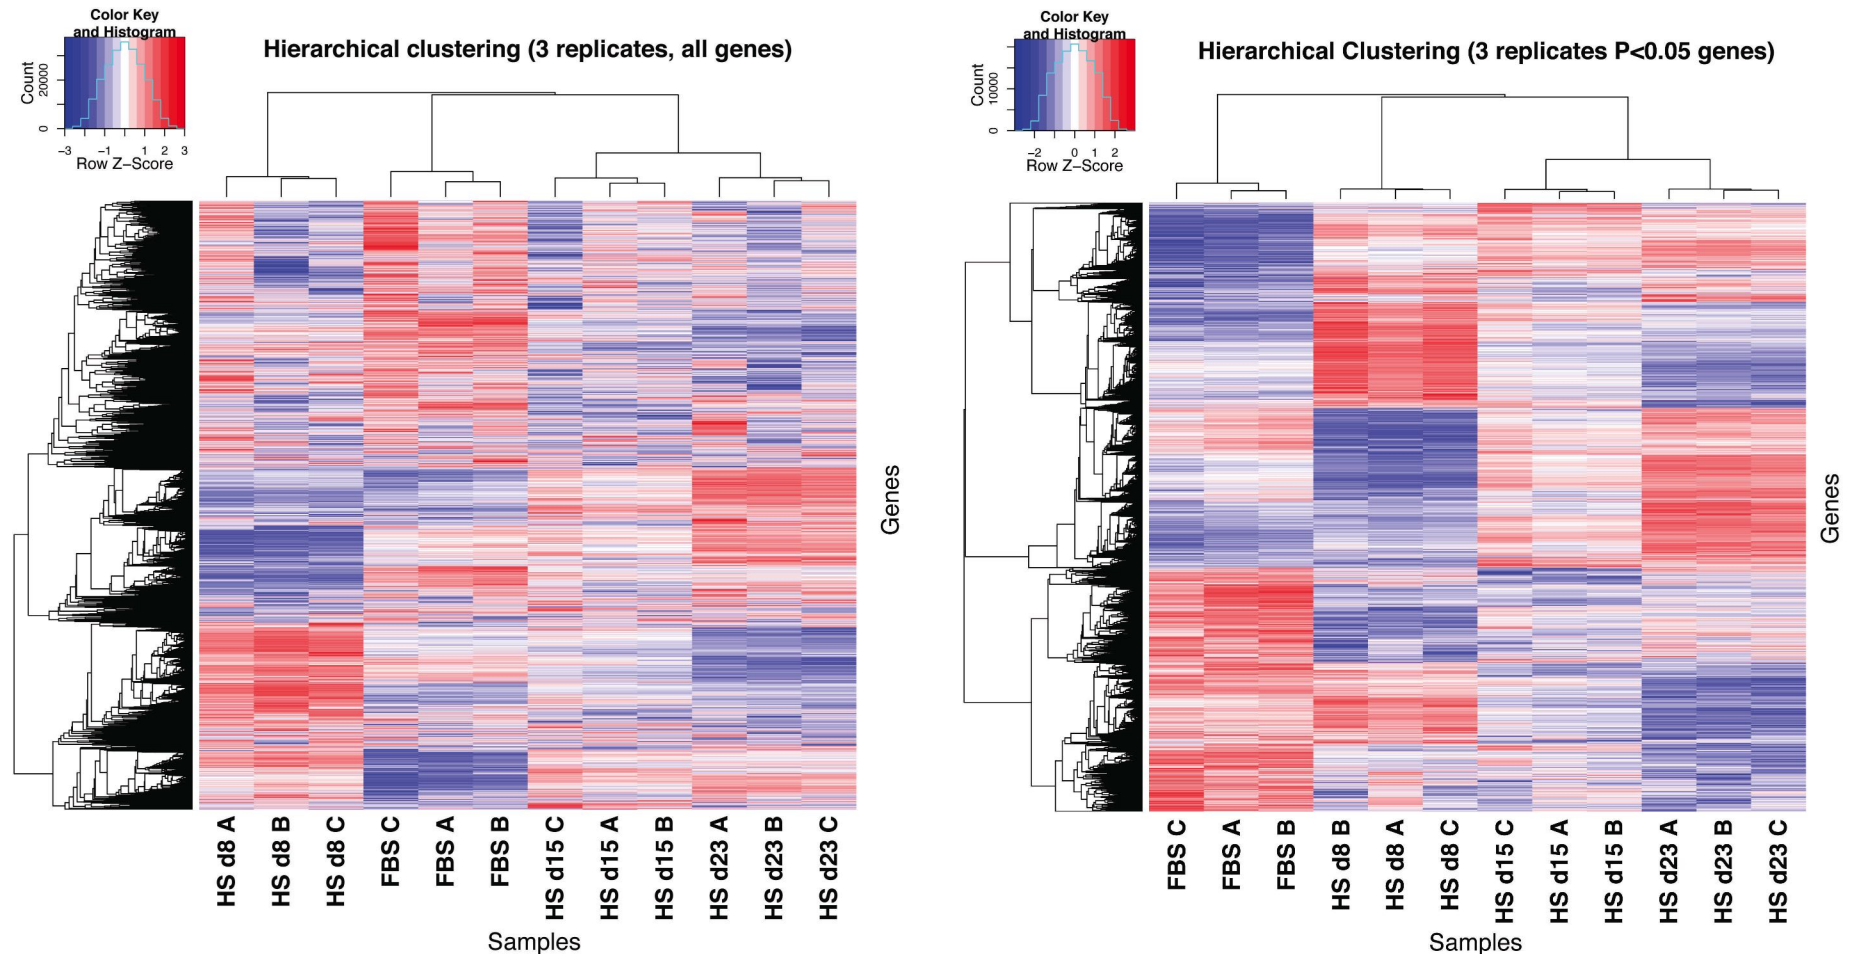

Clustering is a machine learning algorithm that groups data that have a high degree of similarity together in a cluster. In this analysis, data were clustered, initially, by using hierarchical clustering as shown above, based on gene expression pattern similarity of the entire dataset (y-axis) as well as on patterns of expression over time (x-axis). The z-scores of the gene expression levels were used in order to focus on the expression variation pattern across the samples rather than on their absolute expression levels, which can vary strongly from gene to gene.

Hierarchical clustering of the entire data set is shown on the left and of transcripts that showed a significant change ( $p < 0.05$ ) is shown on the right. In both analyses the replicates clustered together (x-axis), as was also shown by the PCA analysis (figure 1), and 6 patterns emerged (y-axis) when the data with significant changes were considered (right panel). To further analyze the genes or processes that were associated with these 6 clusters, a variant of k-means clustering was used, PAM clustering (partitioning around medoids), to generate more clearly delineated clusters (see figure 3 in the main document).

**Supplemental Data 5: DREM analysis**

The Dynamic Regulatory Events Miner (DREM) allows one to model, analyze, and visualize transcriptional gene regulation dynamics. The method of DREM takes as input time series gene expression data and known transcription factor-gene interaction data, and produces as output a dynamic regulatory map. The dynamic regulatory map highlights major branching events in the time series expression data and described the transcription factors (TFs) potentially responsible for them.

**A:** TFs that were significantly upregulated and predicted to be associated with upregulated pathways ( $p < 10e-12$ ).

**B:** TFs predicted to be associated with upregulated pathways ( $p < 10e-12$ ) (in order of significance for the associated processes).

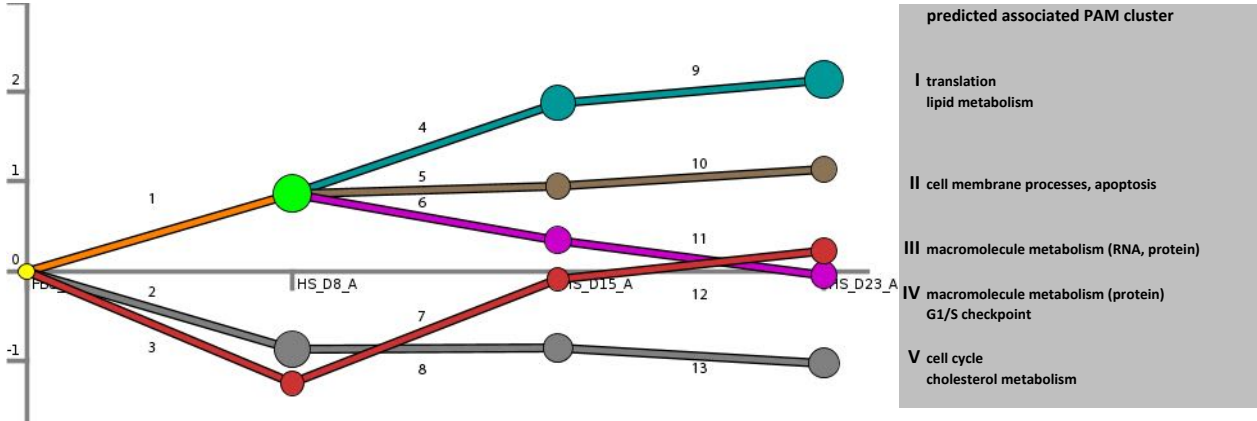

FBS to Day 8

DAY8 TO DAY 15

DAY15 TO DAY 23

**A**

| 1 | 2 | 3 |
|---|---|---|
|   |   |   |

| 4 | 5                           | 6   | 7   | 8          |
|---|-----------------------------|-----|-----|------------|
|   | AHR<br>MYC<br>EGR1<br>DDIT3 | AHR | AHR | MYC<br>AHR |

| 9 | 10                  | 11  | 12  | 13         |
|---|---------------------|-----|-----|------------|
|   | AHR<br>MYC<br>DDIT3 | AHR | AHR | MYC<br>AHR |

**B**

|        |        |        |
|--------|--------|--------|
| RXRA   | POU2F1 | CUX1   |
| POU2F1 | HNF1A  | POU2F1 |
| CUX1   | CUX1   | MEF2A  |
| MEF2A  | POU3F2 | TCF3   |
| HNF1A  | RXRA   | STAT1  |
| STAT1  | NR3C1  | STAT4  |
| TCF3   | STAT1  | RXRA   |
| SRF    | MEF2A  | CEBPA  |
| PPARG  | NFYA   | SRF    |
| IRF1   | PGR    | PDX1   |
| POU3F2 | CEBPA  | FOX1L  |
| STAT5A | NFYB   | ARNT   |
| CREB1  | IRF1   | AIRE   |
| NR1H2  | IRF7   | CD40   |
| PBX1   | TFDP1  | STAT6  |
| ARNT   | JUN    | RORA   |
| CD40   | DSP    | STAT2  |
| GATA1  | E2F4   | AHR    |
| NFKB1  | E2F1   | EGR3   |
| NR3C1  | PAX6   | NFKB1  |
| TBP    | GATA1  | E2F4   |
| CEBPA  | CREB1  | STAT5B |
| AR     | PBX1   | TFDP1  |
| NFYA   | IRF2   | TBX5   |
| IRF8   | FOXO4  | DSP    |
| SRY    | MYC    |        |
| IRF2   | MAX    |        |
| STAT3  | ZEB1   |        |
| NFYB   | AIRE   |        |
| HNF4A  | PPARG  |        |
| AHR    | E2F3   |        |
| GABPA  | FOX1D  |        |
| PAX6   | TBP    |        |
| PGR    | SOX9   |        |
| HNF1B  | TP53   |        |
| NR2F2  | ATF2   |        |
| MEIS1  | NFKB1  |        |
| JUN    | NRF1   |        |
| PDX1   | FOXC1  |        |
| RORA   | GATA3  |        |
| SOX9   | LMO2   |        |

|        |        |        |        |        |
|--------|--------|--------|--------|--------|
| MEF2A  | RXRA   | POU2F1 | CUX1   | POU2F1 |
| POU2F1 | MEF2A  | CUX1   | POU2F1 | HNF1A  |
| RXRA   | POU2F1 | GABPA  | MEF2A  | CUX1   |
| IRF1   | PPARG  | GATA1  | TCF3   | POU3F2 |
| SRF    | STAT1  | HNF1A  | STAT1  | RXRA   |
| HNF1A  | CUX1   | TCF3   | STAT4  | NR3C1  |
| CUX1   | HNF1A  | RXRA   | RXRA   | STAT1  |
| NR3C1  | TCF3   | STAT1  | CEBPA  | MEF2A  |
| TCF3   | POU3F2 | TBP    | SRF    | NFYA   |
| PPARG  | CREB1  | ELK4   | PDX1   | PGR    |
| NRIH4  | STAT5A | TEAD1  | FOX1L  | CEBPA  |
| PBX1   | NR1H2  | IRF1   | ARNT   | NFYB   |
| NR2F2  | SRF    | SRF    | AIRE   | IRF1   |
| CEBPA  | NFKB1  | ARNT   | CD40   | IRF7   |
| STAT1  | CD40   | CREB1  | STAT6  | TFDP1  |
|        | NFYA   | JUN    | RORA   | JUN    |
|        | PBX1   | POU1F1 | STAT2  | DSP    |
|        | ARNT   | NFE2L1 | EGR3   | E2F4   |
|        | NFYB   | STAT5A | NFKB1  | E2F1   |
|        | PGR    | RORA   | E2F4   | PAX6   |
|        | NR3C1  | TP53   | STAT5B | GATA1  |
|        | AR     | IL6    | TFDP1  | CREB1  |
|        | IRF1   | TFAP2A | TBX5   | PBX1   |
|        | FOX1D  | NFYA   | DSP    | IRF2   |
|        | MEIS1  | CEBPB  |        | FOXO4  |
|        | SRY    | FOX1L  |        | MAX    |
|        | CEBPA  | ATF2   |        | AIRE   |
|        | PAX5   | FOS    |        | PPARG  |
|        | MAX    | EFNA2  |        | E2F3   |
|        | VDR    | STAT4  |        | FOX1D  |
|        | PAX6   |        |        | TBP    |
|        | REST   |        |        | SOX9   |
|        | IRF8   |        |        | TP53   |
|        | JUN    |        |        | ATF2   |
|        | SOX9   |        |        | NFKB1  |
|        | FOX1J  |        |        | NRF1   |
|        | PDX1   |        |        | FOX1C  |
|        | STAT3  |        |        | GATA3  |
|        | NR1H3  |        |        | LMO2   |
|        | RORA   |        |        | RXR8   |
|        | IRF2   |        |        | HNF1B  |

|        |        |        |        |        |
|--------|--------|--------|--------|--------|
| MEF2A  | RXRA   | POU2F1 | CUX1   | POU2F1 |
| POU2F1 | MEF2A  | CUX1   | POU2F1 | HNF1A  |
| RXRA   | POU2F1 | GABPA  | MEF2A  | CUX1   |
| IRF1   | PPARG  | GATA1  | TCF3   | POU3F2 |
| SRF    | STAT1  | HNF1A  | STAT1  | RXRA   |
| HNF1A  | CUX1   | TCF3   | STAT4  | NR3C1  |
| CUX1   | HNF1A  | RXRA   | RXRA   | STAT1  |
| NR3C1  | TCF3   | STAT1  | CEBPA  | MEF2A  |
| TCF3   | POU3F2 | TBP    | SRF    | NFYA   |
| PPARG  | CREB1  | ELK4   | PDX1   | PGR    |
| NRIH4  | STAT5A | TEAD1  | FOX1L  | CEBPA  |
| PBX1   | NR1H2  | IRF1   | ARNT   | NFYB   |
| NR2F2  | SRF    | SRF    | AIRE   | IRF1   |
| CEBPA  | NFKB1  | ARNT   | CD40   | IRF7   |
| STAT1  | CD40   | CREB1  | STAT6  | TFDP1  |
|        | NFYA   | JUN    | RORA   | JUN    |
|        | PBX1   | POU1F1 | STAT2  | DSP    |
|        | ARNT   | NFE2L1 | EGR3   | E2F4   |
|        | NFYB   | STAT5A | NFKB1  | E2F1   |
|        | PGR    | RORA   | E2F4   | PAX6   |
|        | NR3C1  | TP53   | STAT5B | GATA1  |
|        | AR     | IL6    | TFDP1  | CREB1  |
|        | IRF1   | TFAP2A | TBX5   | PBX1   |
|        | FOX1D  | NFYA   | DSP    | IRF2   |
|        | MEIS1  | CEBPB  |        | FOXO4  |
|        | SRY    | FOX1L  |        | MAX    |
|        | CEBPA  | ATF2   |        | AIRE   |
|        | PAX5   | FOS    |        | PPARG  |
|        | MAX    | EFNA2  |        | E2F3   |
|        | VDR    | STAT4  |        | FOX1D  |
|        | PAX6   |        |        | TBP    |
|        | REST   |        |        | SOX9   |
|        | IRF8   |        |        | TP53   |
|        | JUN    |        |        | ATF2   |
|        | SOX9   |        |        | NFKB1  |
|        | FOX1J  |        |        | NRF1   |
|        | PDX1   |        |        | FOX1C  |
|        | STAT3  |        |        | GATA3  |
|        | NR1H3  |        |        | LMO2   |
|        | RORA   |        |        | RXR8   |
|        | IRF2   |        |        | HNF1B  |

NR1H4 AHR  
VDR RXRB  
IRF7 HNF1B  
SOX5 CEBPB  
FOXF2 GATA2  
RELA ELK1  
MAX HIF1A  
EGR1 SETD2  
IRF3 HNF4A  
IRF4 RFX1  
IRF5 CD40  
LEF1 FOS  
NR2F1 RUNX1  
POU1F1 PDX1  
ARID5B BACH1  
CEBPD STAT6  
E2F1 CASR  
EGR2 NR1I2  
PAX5 FOXF2  
FOS POU3F1  
ATF6 MZF1  
FOXA1 SPIB  
ZBTB16 STAT5A  
TP53 IRF3  
NKX3-1 IRF4  
FKBP4 IRF5  
FOXO1 IRF8  
REST STAT3  
CNTN2 FOXJ2  
MYC POU2F2  
RFX1 GATA4  
STAT5B NR1H2  
ELK4 BACH2  
ONECUT1 USF2  
ONECUT2 ARNT  
CEBPB ATF1  
SREBF1 GABPA  
FOXO3 AR  
HOXA9 SPI  
STAT4 NFE2L1  
STAT6 CEBPG  
IRF9 HSF1  
EGR3 NR1H4  
NFE2L1 UBE4A  
TEAD1 VDR  
ELSPBP1 NR2F2  
FOXJ1 STAT4  
FOXA2 ETS2  
FOXA3 PLAU  
FOXM1 GATA6  
FOXC1 SRY  
PLAU SRF  
ATF2 ESR1  
NR1H3 NR2F1  
ETS1 SREBF1  
FOXD1 SP3  
ZEB1 NR1H3  
FOXO4 FOXO1  
SOX10 NHLH1  
FOXL1 PAX2  
ELF2 RUNX2  
POU3F1 TCF3  
BACH1 ATF3  
MYOD1 GABPB1  
RREB1 GABPB2  
ALX1 RFX5  
NR1I2 RFXANK  
ESR1 RFXAP  
LHX3 FOSL1  
ETS2 JUNB  
ATF3 JUND  
CASR TFAP2A  
FOSL1 TEAD1  
JUNB TBX5  
JUND GFI1  
TFAP2A GFI1B  
USF1 CREM  
SP1 HOXA7  
YY1 LEF1  
DSP FOSL2  
RXRB ARID5B  
CREM FOXO3  
SMAD4 FOXI1  
ALX4 NR5A2  
FOSL2 ATF7  
STAT2 STAT5B  
HLF LHX3  
ATF1 ETS1  
TCF4 RARA

HNF1B  
GATA1  
FOXC1  
FKBP4  
SOX5  
HNF4A  
LEF1  
SREBF1  
CEBPD  
ZBTB16  
HOXA9  
ATF6  
CNTN2  
PLAU  
TBP  
ONECUT2  
E2F1  
ATF3  
RREB1  
STAT6  
FOXO1  
FOXA1  
RFX1  
STAT5B  
IRF7  
RELA  
NR1H4  
NKX3-1  
NR2F2  
STAT4  
ATF2  
CASR  
EGR3  
NR1I2  
EGR2  
FOXO4  
CEBPB  
NR2F1  
ETS1  
SP1  
FOXO3  
FOXA2  
FOXA3  
FOXM1  
FOS  
IRF3  
IRF4  
IRF5  
GABPA  
RXRB  
ALX1  
POU1F1  
ARID5B  
POU3F1  
SOX10  
STAT2  
BACH1  
SP3  
ESR1  
TP53  
SP4  
TOPORS  
TFAP2A  
ZNF589  
ELSPBP1  
ETS2  
POU2F2  
SMAD4  
PPARA  
DSP  
FOXD3  
IRF9  
ELF2  
ATF4  
ELK1  
MYOD1  
FOSL1  
JUNB  
JUND  
NR6A1  
ELK4  
USF1  
FOXJ2  
FOXJ2  
ATF7  
BACH2  
HLF  
FOXI1  
TFAP4  
PAX2

CEBPB  
GATA2  
ELK1  
HIF1A  
SETD2  
HNF4A  
RFX1  
CD40  
FOS  
RUNX1  
PDX1  
HOXA9  
BACH1  
STAT6  
CASR  
NR1I2  
FOXF2  
POU3F1  
MZF1  
SPIB  
STAT5A  
irf3  
irf4  
irf5  
irf8  
stat3  
IRF7  
foxf2  
pou2f2  
gata4  
nr1h2  
bach2  
usf2  
arnt  
atf1  
gabpa  
AR  
SPI1  
nfe2l1  
cebpb  
nr2f1  
hsf1  
nr1h4  
ube4a  
vdr  
NR2F2  
FOXA3  
STAT4  
ETS2  
PLAU  
GATA6  
SRY  
SRF  
ESR1  
NR2F1  
ALX1  
SP3  
NR1H3  
FOXO1  
NHLH1  
STAT2  
RUNX2  
TCF3  
ATF3  
GABPB1  
GABPB2  
SP4  
RFX5  
RFXANK  
RFXAP  
FOSL1  
JUNB  
ETS2  
JUND  
TFAP2A  
SMAD4  
TEAD1  
TBX5  
GFI1  
GFI1B  
CREM  
ELF2  
HOXA7  
LEF1  
FOSL2  
ARID5B  
FOXO3  
FOXO3  
FOXO3  
FOXO3  
NR5A2  
ATF7  
STAT5B  
LHX3  
LHX3  
ETS1  
RARA  
RARB  
RARG  
CEBPD  
SMAD3

HNF1B  
GATA1  
FOXC1  
FKBP4  
SOX5  
HNF4A  
RFX1  
SREBF1  
CEBPD  
ZBTB16  
PDX1  
HOXA9  
ATF6  
CNTN2  
PLAU  
TBP  
ONECUT2  
E2F1  
ATF3  
RREB1  
STAT6  
FOXO1  
FOXA1  
RFX1  
STAT5B  
IRF8  
stat3  
RELA  
NR1H4  
NKX3-1  
NR2F2  
STAT4  
ATF2  
CASR  
EGR3  
NR1I2  
EGR2  
FOXO4  
CEBPB  
NR2F1  
ETS1  
SP1  
FOXO3  
FOXA2  
FOXA3  
FOXM1  
FOS  
IRF3  
IRF4  
IRF5  
GABPA  
RXRB  
ALX1  
POU1F1  
ARID5B  
POU3F1  
SOX10  
STAT2  
BACH1  
SP3  
ESR1  
TP53  
SP4  
TOPORS  
TFAP2A  
ZNF589  
ELSPBP1  
ETS2  
POU2F2  
SMAD4  
PPARA  
DSP  
FOXD3  
IRF9  
ELF2  
ATF4  
ELK1  
MYOD1  
FOSL1  
JUNB  
JUND  
NR6A1  
ELK4  
USF1  
FOXJ2  
FOXJ2  
ATF7  
BACH2  
HLF  
FOXI1  
TFAP4  
PAX2

CEBPB  
GATA2  
ELK1  
HIF1A  
SETD2  
HNF4A  
RFX1  
CD40  
FOS  
RUNX1  
PDX1  
BACH1  
STAT6  
CASR  
NR1I2  
FOXF2  
POU3F1  
MZF1  
SPIB  
STAT5A  
irf3  
irf4  
irf5  
irf8  
stat3  
foxf2  
pou2f2  
gata4  
nr1h2  
bach2  
usf2  
arnt  
atf1  
gabpa  
AR  
SPI1  
nfe2l1  
cebpb  
nr2f1  
hsf1  
nr1h4  
ube4a  
vdr  
NR2F2  
STAT4  
ETS2  
PLAU  
GATA6  
SRY  
SRF  
ESR1  
NR2F1  
SP3  
NR1H3  
FOXO1  
NHLH1  
PAX2  
RUNX2  
TCF3  
ATF3  
GABPB1  
GABPB2  
RFX5  
RFXANK  
RFXAP  
FOSL1  
JUNB  
JUND  
TFAP2A  
TEAD1  
TBX5  
GFI1  
GFI1B  
CREM  
HOXA7  
LEF1  
FOSL2  
ARID5B  
FOXO3  
FOXO3  
FOXO3  
FOXO3  
NR5A2  
ATF7  
STAT5B  
LHX3  
ETS1  
RARA  
RARB  
RARG  
CEBPD  
SMAD3

|         |        |
|---------|--------|
| FOXD3   | RARB   |
| ZNF238  | RARG   |
| CEBPG   | RXRG   |
| NFIL3   | CEBPD  |
| IRF6    | SMAD3  |
| BACH2   | USF1   |
| SP3     | GATA5  |
| PPARA   | ATF6   |
| FOXJ2   | FOXJ1  |
| POU2F2  | ATF4   |
| TFAP4   | EFNA2  |
| GATA2   | NFATC1 |
| NKX2-1  | NFATC2 |
| NKX2-2  | NFATC3 |
| NR6A1   | NFATC4 |
| AIRE    | SOX5   |
| E2F4    | BRCA1  |
| ELK1    | ETV4   |
| POU2AF1 | NKX2-1 |
| POU4F1  | FOXL1  |
| POU5F1  | NFIL3  |
| POU5F1B | SMAD4  |
| FOXI1   | NFIC   |
| NRF1    | MEIS1  |
| PAX2    | TFE3   |
| TFDP1   | TFEB   |
| CUZD1   | YY1    |
| FLI1    | CEBPE  |
| HSF1    | PAX8   |

|         |
|---------|
| FOXL1   |
| POU2AF1 |
| POU4F1  |
| POU5F1  |
| POU5F1B |
| NFKB2   |
| IRF6    |
| SP2     |
| AIRE    |
| E2F4    |
| NFE2L1  |
| TFDP1   |
| TCF4    |
| NFIC    |
| ZNF238  |
| PRDM1   |
| EGR4    |
| GATA4   |
| FOSL2   |
| MTF1    |
| REL     |

|        |
|--------|
| USF1   |
| GATA5  |
| ATF6   |
| FOXJ1  |
| ATF4   |
| EFNA2  |
| NFATC1 |
| NFATC2 |
| NFATC3 |
| NFATC4 |
| SOX5   |
| BRCA1  |
| ETV4   |
| NKX2-1 |
| FOXL1  |
| NFIL3  |
| SMAD4  |
| NFIC   |
| MEIS1  |
| TFE3   |
| TFEB   |
| YY1    |
| CEBPE  |
| PAX8   |
| ELF2   |

|         |
|---------|
| FOXL1   |
| POU2AF1 |
| POU4F1  |
| POU5F1  |
| POU5F1B |
| NFKB2   |
| IRF6    |
| SP2     |
| AIRE    |
| E2F4    |
| NFE2L1  |
| TFDP1   |
| TCF4    |
| NFIC    |
| ZNF238  |
| PRDM1   |
| EGR4    |
| GATA4   |
| FOSL2   |
| MTF1    |
| REL     |

|        |
|--------|
| USF1   |
| GATA5  |
| ATF6   |
| FOXJ1  |
| ATF4   |
| EFNA2  |
| NFATC1 |
| NFATC2 |
| NFATC3 |
| NFATC4 |
| SOX5   |
| BRCA1  |
| ETV4   |
| NKX2-1 |
| FOXL1  |
| NFIL3  |
| SMAD4  |
| NFIC   |
| MEIS1  |
| TFE3   |
| TFEB   |
| YY1    |
| CEBPE  |
| PAX8   |
| ELF2   |

## Supplemental data 6

### regulation of the Warburg effect

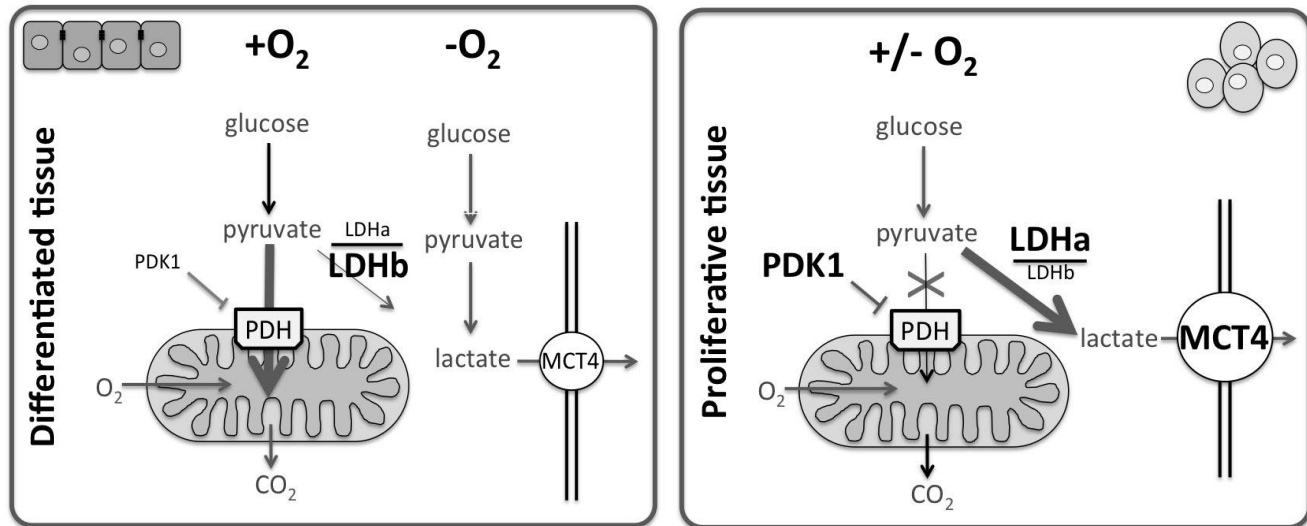

Proliferating cells often display a metabolic profile that is referred to as ‘cancer metabolism’, first described by Otto Warburg in 1924. Cancer metabolism is typically characterized by reduced levels of oxidative phosphorylation and mitochondrial activity, higher dependence on aerobic glycolysis and glutaminolysis for ATP production, and increased generation of biosynthetic intermediates that are essential for the production of macromolecules (phospholipids, nucleotides, proteins) to support cell proliferation (reviewed in<sup>3, 5-7</sup>). The metabolic reprogramming that occurs during the Warburg effect is tightly regulated. The likely benefit for proliferative cells to adopt a Warburg-like metabolic profile, despite the much lower yield of ATP, is the conservation of pyruvate for the synthesis of lipids, nucleotides and amino acids, as building blocks for new cells<sup>1-4</sup>.

Key regulators of the Warburg effect include:

\* **PDK1** (pyruvate dehydrogenase kinase 1): in proliferative cells PDK1 is up-regulated, inhibiting PDH (pyruvate dehydrogenase), which transport pyruvate into the mitochondria, PDK1 upregulation results in limiting the uptake of pyruvate into the mitochondria. *PDK1 is down-regulated in HS-cultured cells, in line with a non-proliferative character. PDH did not change.*

\* **LDHA and LDHB**: lactate dehydrogenases A and B catalyze the conversion of pyruvate to lactate (LDHA), vice versa (LDHB) High LDHA levels direct the conversion of pyruvate to lactate, whereas low LDHA levels, with higher LDHB levels favour the reverse reaction. *LDHA is decreased in HS cultured cells, whereas LDHB is increased, consistent with the ratio in differentiated tissue*

\* **MCT4** (monocarboxylic acid transporter 4): MCT4 removes lactate from the cells, and is increased during aerobic glycolysis (right panel). *MCT4 is decreased in HS cultured cells, consistent with the reversal of the Warburg effect.*

1. Cairns, R.A., Harris, I.S. & Mak, T.W. Regulation of cancer cell metabolism. *Nat Rev Cancer* 11, 85-95 (2011).
2. Lunt, S.Y. & Vander Heiden, M.G. Aerobic glycolysis: meeting the metabolic requirements of cell proliferation. *Annu Rev Cell Dev Biol* 27, 441-464 (2011).
3. Pavlova, N.N. & Thompson, C.B. The Emerging Hallmarks of Cancer Metabolism. *Cell Metab* 23, 27-47 (2016).
4. Vander Heiden, M.G., Cantley, L.C. & Thompson, C.B. Understanding the Warburg effect: the metabolic requirements of cell proliferation. *Science* 324, 1029-1033 (2009).



## Supplemental Data 7: 25 genes with highest increase or decrease in expression

### Increased expression (Top 25)

| Gene Title                                                       | Gene Symbol | fold increase |            |                   |
|------------------------------------------------------------------|-------------|---------------|------------|-------------------|
|                                                                  |             | d8            | d15        | d23               |
| 1 sulfotransferase family 1E, estrogen-preferring, member 1      | SULT1E1     | 1.60980851    | 10.074521  | <b>17.2660059</b> |
| 2 apolipoprotein A-IV                                            | APOA4       | 1.46445382    | 3.96256758 | <b>12.9515673</b> |
| 3 urothelial cancer associated 1 (non-protein coding)            | UCA1        | 13.0403278    | 14.1624532 | <b>12.653981</b>  |
| 4 S100 calcium binding protein A14                               | S100A14     | 1.10835538    | 2.47252987 | <b>12.1360695</b> |
| 5 anterior gradient 2 homolog (Xenopus laevis)                   | AGR2        | 4.09387803    | 7.3550794  | <b>11.4152296</b> |
| 6 phospholipase A1 member A                                      | PLA1A       | 1.72761844    | 6.24060598 | <b>11.0728783</b> |
| 7 Kruppel-like factor 4 (gut)                                    | KLF4        | 4.8156499     | 6.25374168 | <b>10.9723147</b> |
| 8 epithelial splicing regulatory protein 1                       | ESRP1       | 1.72298527    | 4.746049   | <b>10.2605455</b> |
| 9 guanylate binding protein 2, interferon-inducible              | GBP2        | 4.90674414    | 7.71908765 | <b>10.2079568</b> |
| 10 transcription factor EC                                       | TFEC        | 2.9324839     | 5.22814844 | <b>9.95592446</b> |
| 11 leucine rich repeat containing 19                             | LRRC19      | 1.10196646    | 2.89413995 | <b>9.76210338</b> |
| 12 zinc finger protein 114                                       | ZNF114      | 2.96517484    | 4.5009058  | <b>9.35384665</b> |
| 13 cholinergic receptor, nicotinic, alpha 1 (muscle)             | CHRNA1      | 3.89463693    | 4.89524151 | <b>8.91442928</b> |
| 14 discoidin domain receptor tyrosine kinase 1 /// microRNA 4640 | DDR1        | 1.01238471    | 3.17424196 | <b>8.03071659</b> |
| 15 chromosome 19 open reading frame 69                           | C19orf69    | 1.08588648    | 2.76599503 | <b>7.98168685</b> |
| 16 UDP glucuronosyltransferase 2 family, polypeptide A3          | UGT2A3      | 1.85090717    | 6.82158978 | <b>7.87140438</b> |
| 17 protease, serine, 23                                          | PRSS23      | 3.95576075    | 6.46029912 | <b>7.76669156</b> |
| 18 chromosome 12 open reading frame 39                           | C12orf39    | 4.53196492    | 6.43655253 | <b>7.71021042</b> |
| 19 proline/histidine/glycine-rich 1                              | PHGR1       | 1.80191957    | 5.29692291 | <b>7.02058702</b> |
| 20 anoctamin 1, calcium activated chloride channel               | ANO1        | 0.97804907    | 0.94345729 | <b>6.98110729</b> |
| 21 vanin 2                                                       | VNN2        | 11.4370228    | 10.9074657 | <b>6.93981919</b> |
| 22 insulin-like growth factor binding protein 3                  | IGFBP3      | 0.93963018    | 2.63802643 | <b>6.76395235</b> |
| 23 hephaestin                                                    | HEPH        | 2.6201261     | 4.21156181 | <b>6.52502213</b> |
| 24 cell death-inducing DFFA-like effector c                      | CIDEC       | 4.24499095    | 4.38011981 | <b>6.48955863</b> |
| 25 family with sequence similarity 47, member E                  | FAM47E      | 4.80857272    | 7.66127981 | <b>6.25362451</b> |

### Decreased expression (Top 25)

| Gene Title                                                             | Gene Symbol | fold decrease |            |                   |
|------------------------------------------------------------------------|-------------|---------------|------------|-------------------|
|                                                                        |             | d8            | d15        | d23               |
| 1 fibrinogen beta chain                                                | FGB         | 1.01799746    | 2.61994629 | <b>5.23852945</b> |
| 2 leukemia inhibitory factor                                           | LIF         | 5.24506451    | 5.02385697 | <b>4.77031089</b> |
| 3 tubulin, beta 1 class VI                                             | TUBB1       | 2.94554978    | 3.25901429 | <b>4.70925991</b> |
| 4 glucan (1,4-alpha-), branching enzyme 1                              | GBE1        | 2.20827505    | 3.07756181 | <b>4.11316342</b> |
| 5 coagulation factor XIII, B polypeptide                               | F13B        | 2.234701      | 3.08244714 | <b>3.96939829</b> |
| 6 reelin                                                               | RELN        | 2.70351405    | 2.92224273 | <b>4.83406186</b> |
| 7 alcohol dehydrogenase 6 (class V)                                    | ADH6        | 3.36367076    | 3.17448993 | <b>4.49200411</b> |
| 8 protein phosphatase 1, regulatory (inhibitor) subunit 1A             | PPP1R1A     | 3.86675208    | 3.40475789 | <b>3.49474836</b> |
| 9 cancer susceptibility candidate 5                                    | CASC5       | 2.32440917    | 2.14682899 | <b>3.47556406</b> |
| 10 F-box and leucine-rich repeat protein 21 (gene/pseudogene)          | FBXL21      | 2.56581742    | 1.99000289 | <b>3.40485515</b> |
| 11 forkhead box N4                                                     | FOXN4       | 2.82919142    | 3.00748786 | <b>3.30598489</b> |
| 12 natriuretic peptide B                                               | NPPB        | 0.73137249    | 1.77084611 | <b>3.2991722</b>  |
| 13 claudin 14                                                          | CLDN14      | 3.44809761    | 3.16915066 | <b>3.28154663</b> |
| 14 fucosyltransferase 11 (alpha (1,3) fucosyltransferase)              | FUT11       | 1.55861651    | 2.67772711 | <b>3.17790018</b> |
| 15 ribonucleotide reductase M2                                         | RRM2        | 1.22693238    | 1.67626212 | <b>3.57449496</b> |
| 16 SPC25, NDC80 kinetochore complex component, homolog (S. cerevisiae) | SPC25       | 1.69842724    | 1.92727121 | <b>3.13577253</b> |
| 17 E2F transcription factor 7                                          | E2F7        | 2.29203247    | 2.27124832 | <b>3.05634284</b> |
| 18 alanine-glyoxylate aminotransferase 2-like 1                        | AGXT2L1     | 1.11519966    | 1.67205374 | <b>3.40744429</b> |
| 19 fibrinogen alpha chain                                              | FGA         | 2.0769312     | 3.00503011 | <b>3.4734301</b>  |
| 20 6-phosphofructo-2-kinase/fructose-2,6-biphosphatase 4               | PFKFB4      | 3.22650034    | 3.78462628 | <b>3.42101327</b> |
| 21 pyruvate dehydrogenase kinase, isozyme 1                            | PDK1        | 2.32540542    | 2.45489876 | <b>3.07676876</b> |
| 22 non-SMC condensin I complex, subunit G                              | NCAPG       | 1.98587391    | 2.51523109 | <b>3.02975911</b> |
| 23 hypoxia inducible lipid droplet-associated                          | HILPDA      | 1.63404113    | 2.40863783 | <b>3.15806134</b> |
| 24 kinesin family member 14                                            | KIF14       | 1.26819019    | 1.80179264 | <b>3.40913024</b> |
| 25 zinc finger protein 789                                             | ZNF789      | 1.45259678    | 2.17329004 | <b>2.86947321</b> |

## Supplemental Data 9

mRNA levels determined by quantitative PCR of different cytochrome P450 genes.

### A: CYP1, 2 and 3 families: drug and steroid metabolism

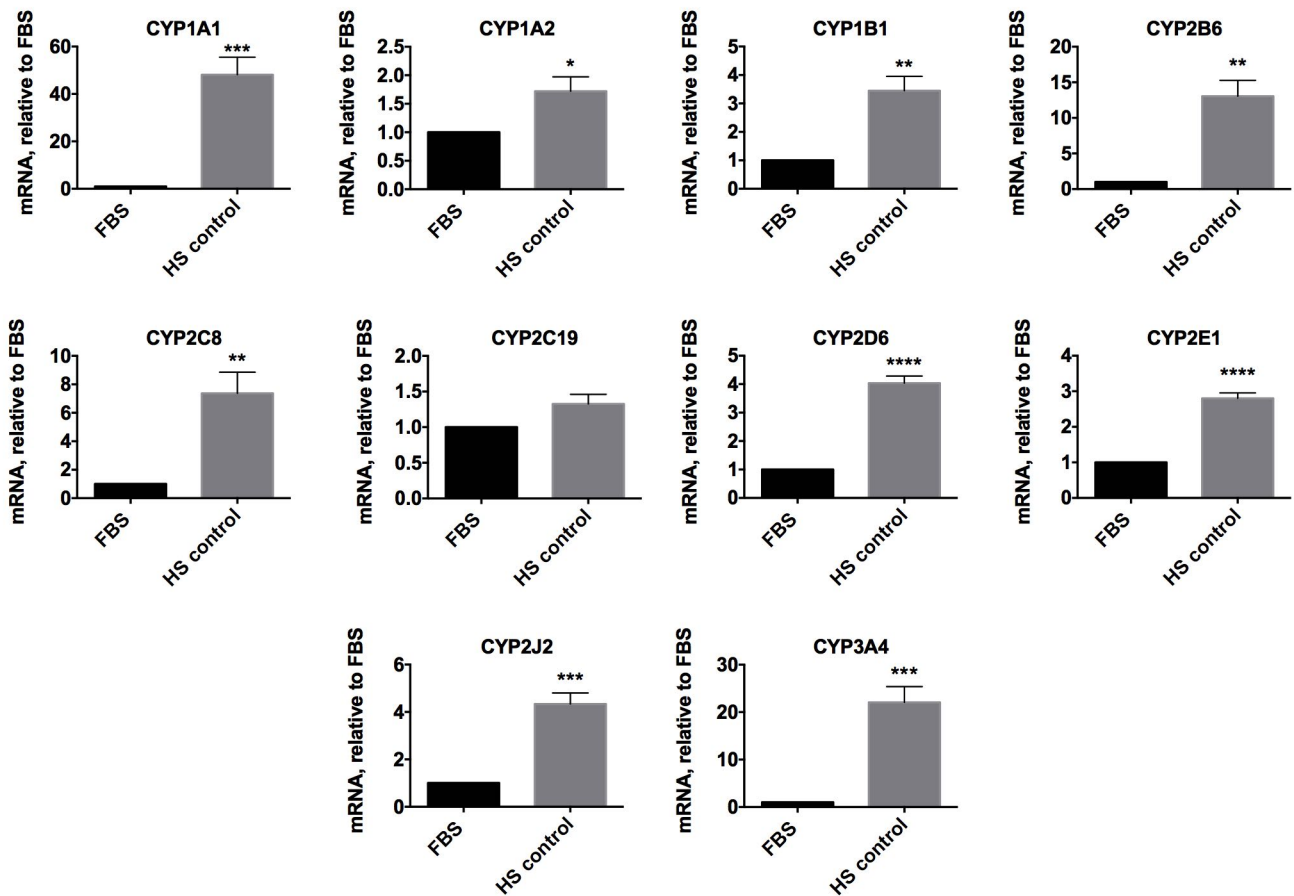

### B: CYP4 family: arachidonic acid or fatty acid metabolism

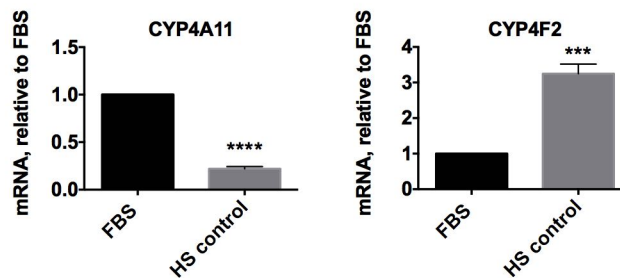

## mRNA levels determined by quantitative PCR of other factors involved in degradation or removal of xenobiotics

### Epoxide hydrolases:

detoxification of exogenous chemicals such as polycyclic aromatic hydrocarbons

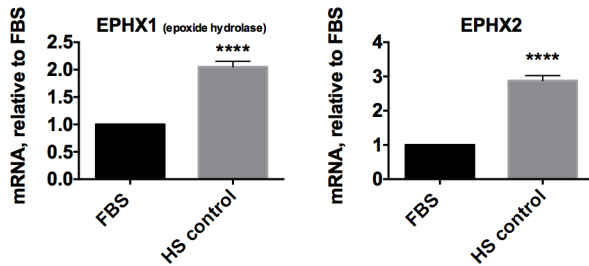

### NQO1, GSTA1:

removal of lipid peroxidation by-products, carcinogens, bilirubin

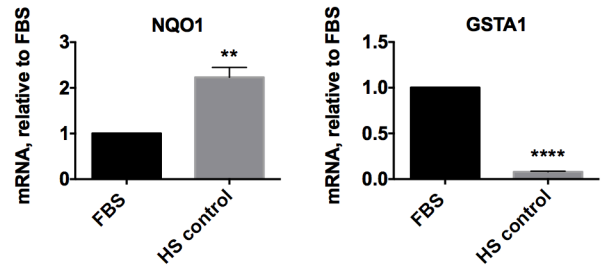

### UDP-glucuronosulfotransferases:

transforms lipophilic molecules such as steroids, bilirubin, hormones, analgesic and other drugs to water soluble compounds

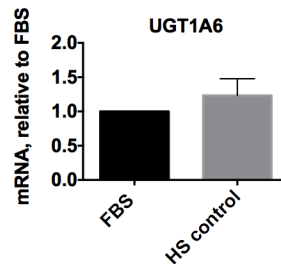

### ABC transporters:

transport of a wide variety of substrates out of the cell, including metabolic products, lipids, steroids, and drugs. ABCA1 removes excess cholesterol from the cell, ABCB1 is also known as MDR-1, ABCC1 is also known as MRP1, ABCD1 transports fatty acids into the peroxisome,

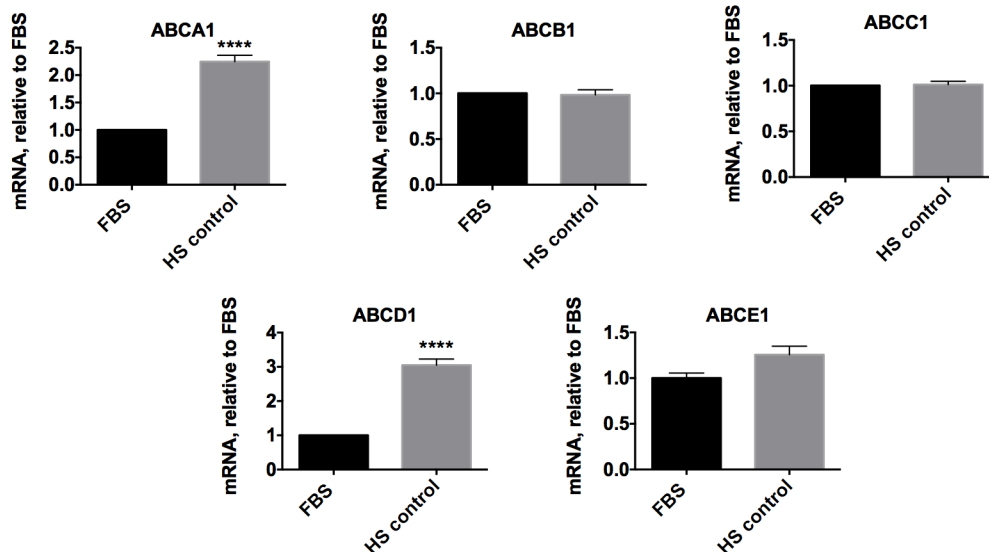

## Supplemental data 10

Full length blot of figure 5C

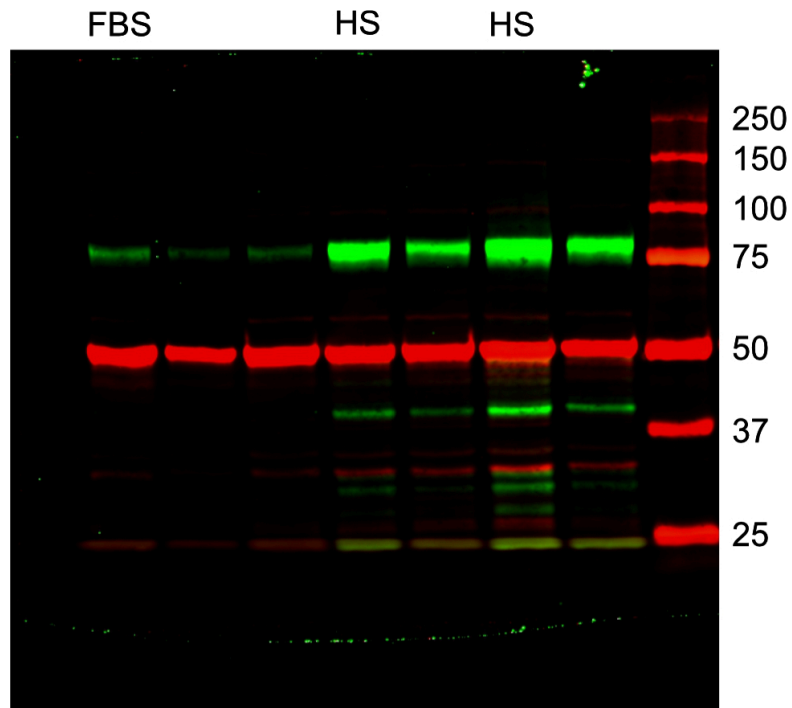

Full length Licor blot of the cropped images of figure 5C. CPT-1 has a predicted size of 78 kDa and is stained green. Tubulin and the molecular weight markers are stained red. Additional, unlabeled lanes on the blot represent other conditions that are not relevant for this study.
